# Supplementary material for: Screening strain sensitive transition metals using oxygen adsorption
Source: Royal Society of Chemistry journal article supplement (doi:10.1039/d1nj04558j), 2021-12-20
Supplement: d1nj04558j1.pdf [file d1nj04558j1.pdf]

# Screening strain sensitive transition metals using oxygen adsorption

*Yucheng He, Pengqi Hai, Chao Wu\**

*Frontier Institute of Science and Technology, Xi'an Jiaotong University, Xi'an*

*710049, Shaanxi, People's Republic of China*

*\*corresponding author at: Frontier Institute of Science and Technology, Xi'an*

*Jiaotong University, Xi'an 710049, Shaanxi, People's Republic of China*

*E-mail address: chaowu@xjtu.edu.cn*

## Contents

|                 |    |
|-----------------|----|
| Figure S1.....  | 1  |
| Figure S2.....  | 2  |
| Figure S3.....  | 3  |
| Figure S4.....  | 4  |
| Figure S5.....  | 5  |
| Figure S6.....  | 6  |
| Figure S7.....  | 7  |
| Figure S8.....  | 8  |
| Figure S9.....  | 9  |
| Figure S10..... | 10 |
| Figure S11..... | 11 |
| Figure S12..... | 12 |
| Figure S13..... | 13 |
| Figure S14..... | 14 |
| Figure S15..... | 15 |
| Figure S16..... | 16 |
| Table S1.....   | 17 |
| Table S2.....   | 18 |
| Table S3.....   | 19 |
| Table S4.....   | 20 |
| Table S5.....   | 22 |
| Table S6.....   | 23 |
| Table S7.....   | 24 |
| Table S8.....   | 25 |

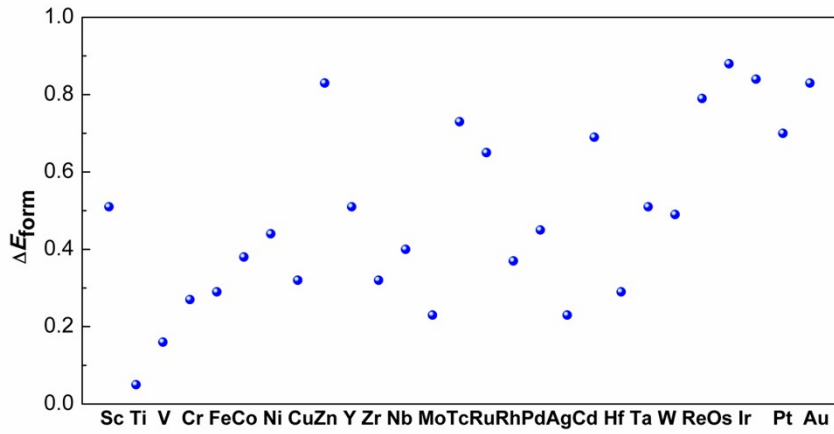

Figure S1. The absolute variation of the formation energy of isolated O\* adatoms in the strain variation range ( $\pm 5\%$ ).

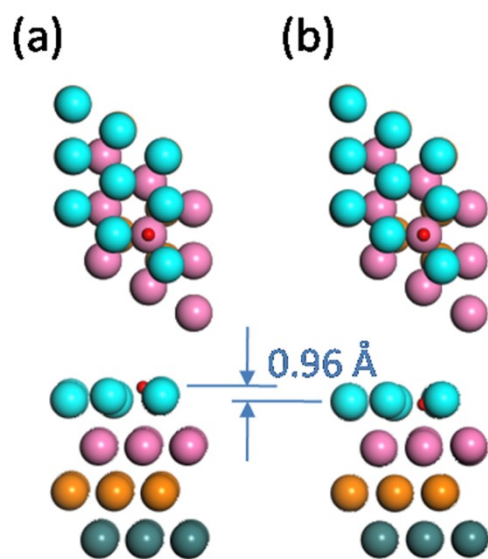

Figure S2. Top and side views of isolated O atom adsorbed on the Cd (0001) facet at (a) 2% strain, and (b) 3% strain. Large balls represent metal atoms and small red balls represent oxygen atom.

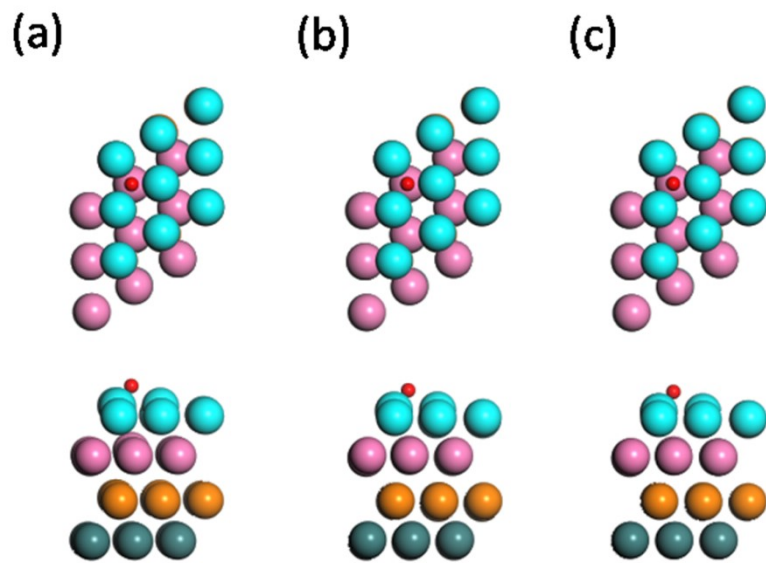

Figure S3. Top and side views of isolated O atom adsorbed on the Ti (0001) facet at (a) -4% strain, (b) -3% strain, and (c) -2% strain.

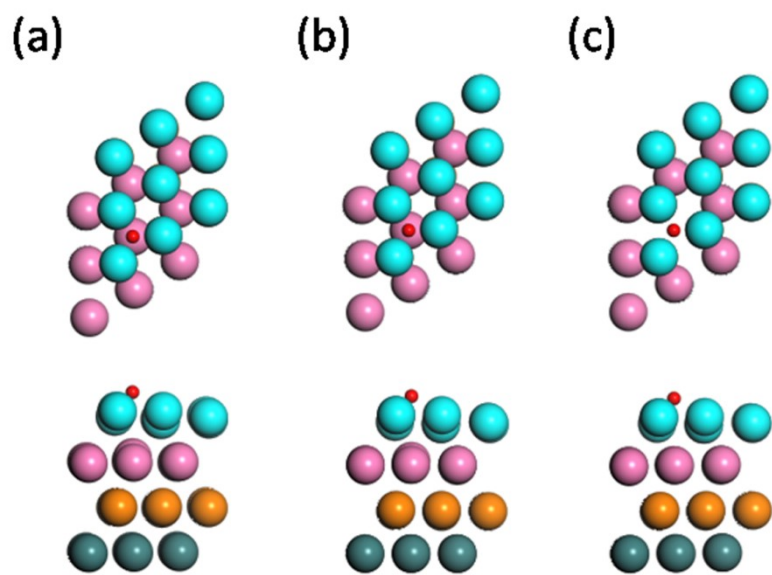

Figure S4. Top and side views of isolated O atom adsorbed on the Zr (0001) facet at (a) -4% strain, (b) -3% strain, and (c) -2% strain.

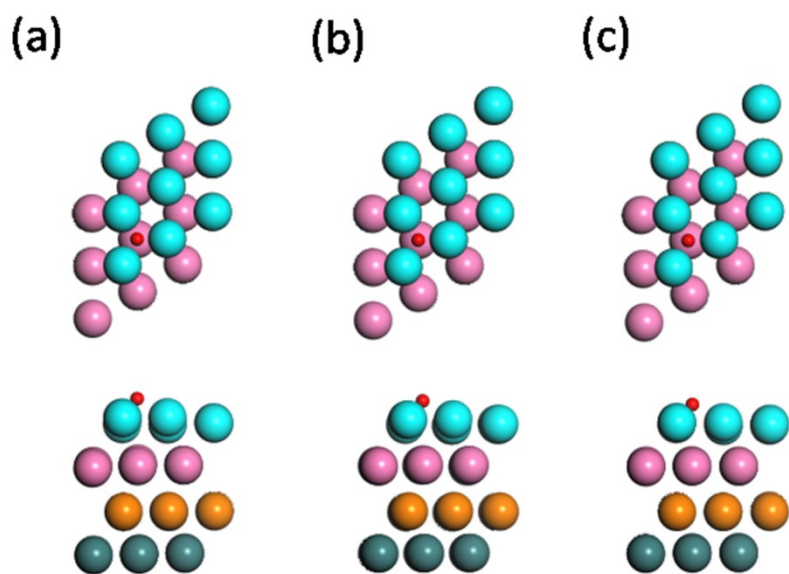

Figure S5. Top and side views of isolated O atom adsorbed on the Hf (0001) facet at (a) -4% strain, (b) -3% strain, and (c) -2% strain.

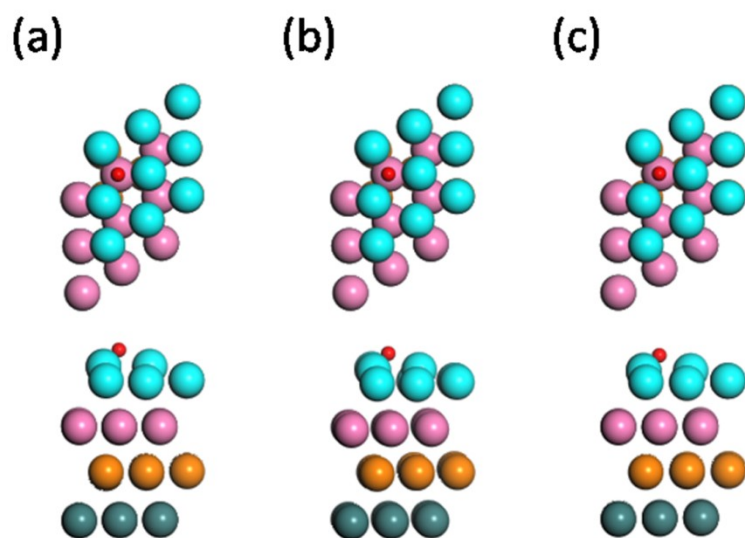

Figure S6. Top and side views of isolated O atom adsorbed on the Zn (0001) facet at (a) -4% strain, (b) -3% strain, and (c) -2% strain.



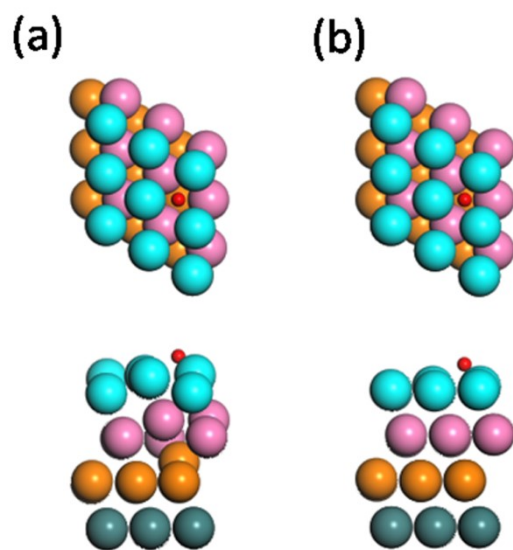

Figure S7. Top and side views of isolated O atom adsorbed on the Au (111) facet at (a) -5% strain, and (b) -4% strain.

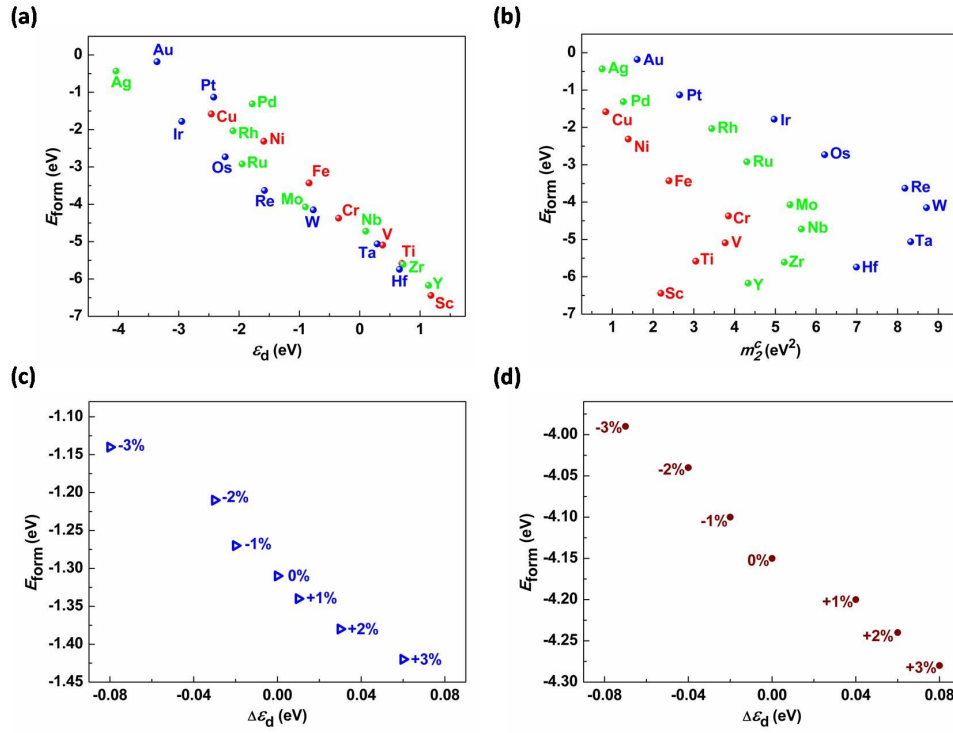

Figure S8. Formation energy of two 1NN O\* adatoms on unstrained close-packed metal facets as a function of (a) the  $d$ -band center  $\epsilon_d$  and (b) the second moment of electronic density of states distribution  $m_2^c$ . Formation energy of two 1NN O\* adatoms on (c) Pd(111) and (d) W(110) as a function of the  $d$ -band center shift  $\Delta\epsilon_d$ . The  $\epsilon_d$  (in a) and  $m_2^c$  (in b) are taken from the work of Nørskov et al.<sup>1</sup> The numbers (in c and d) represent the applied strain.

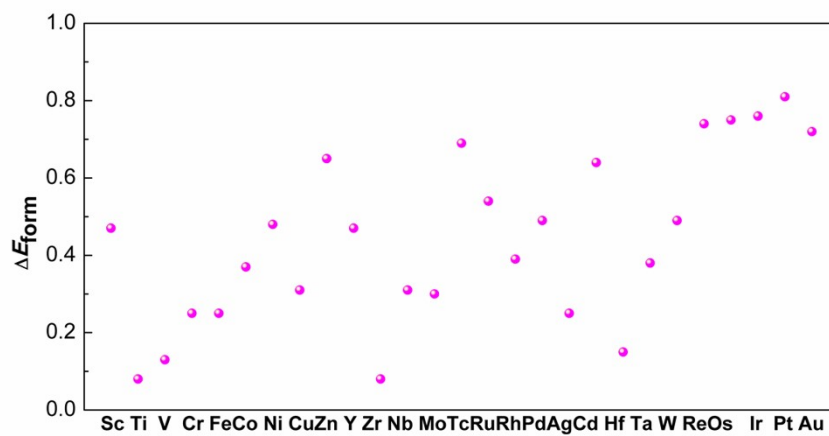

Figure S9. The absolute variation of the formation energy of two 1NN O\* adatoms in the strain variation range ( $\pm 5\%$ ).

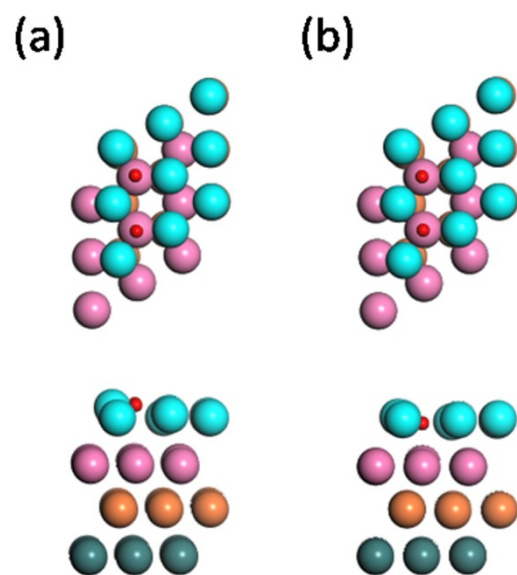

Figure S10. Top and side views of two 1NN O atoms adsorbed on the Cd (0001) facet at (a) +3% strain, and (b) +4% strain.

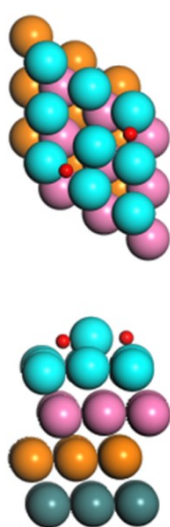

Figure S11. Top and side views of two 1NN O atoms adsorbed on the Ag (111) facet at -5% strain.

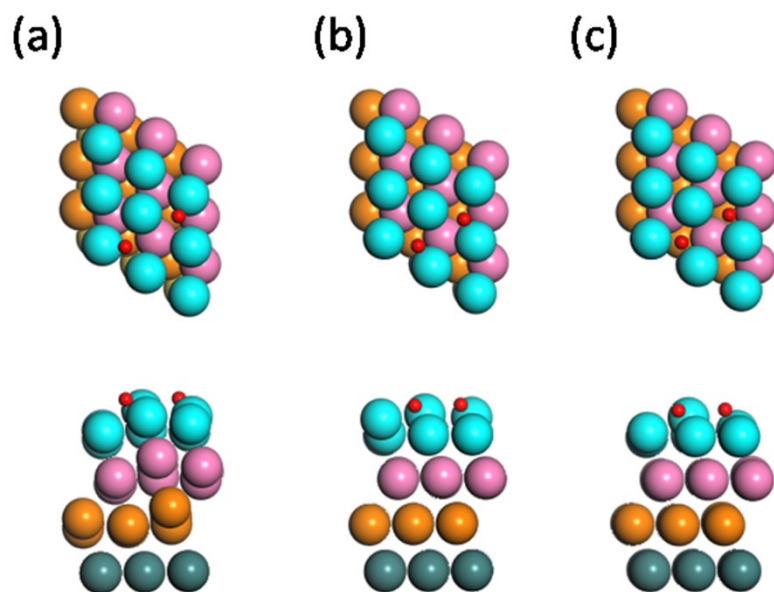

Figure S12. Top and side views of two 1NN O atoms adsorbed on the Au (111) facet at (a) -5% strain, (b) -4% strain, and (c) -3% strain.

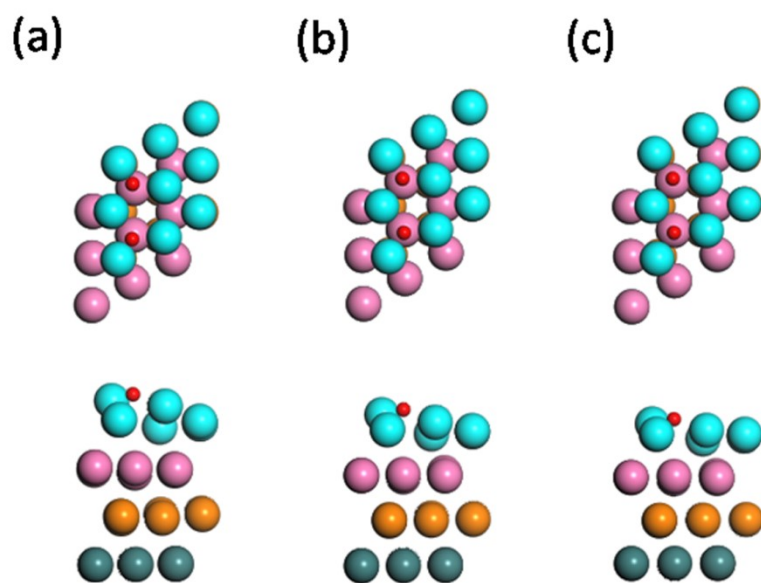

Figure S13. Top and side views of two 1NN O atoms adsorbed on the Zn (0001) facet at (a) -4% strain, (b) 0% strain, and (c) +4% strain.

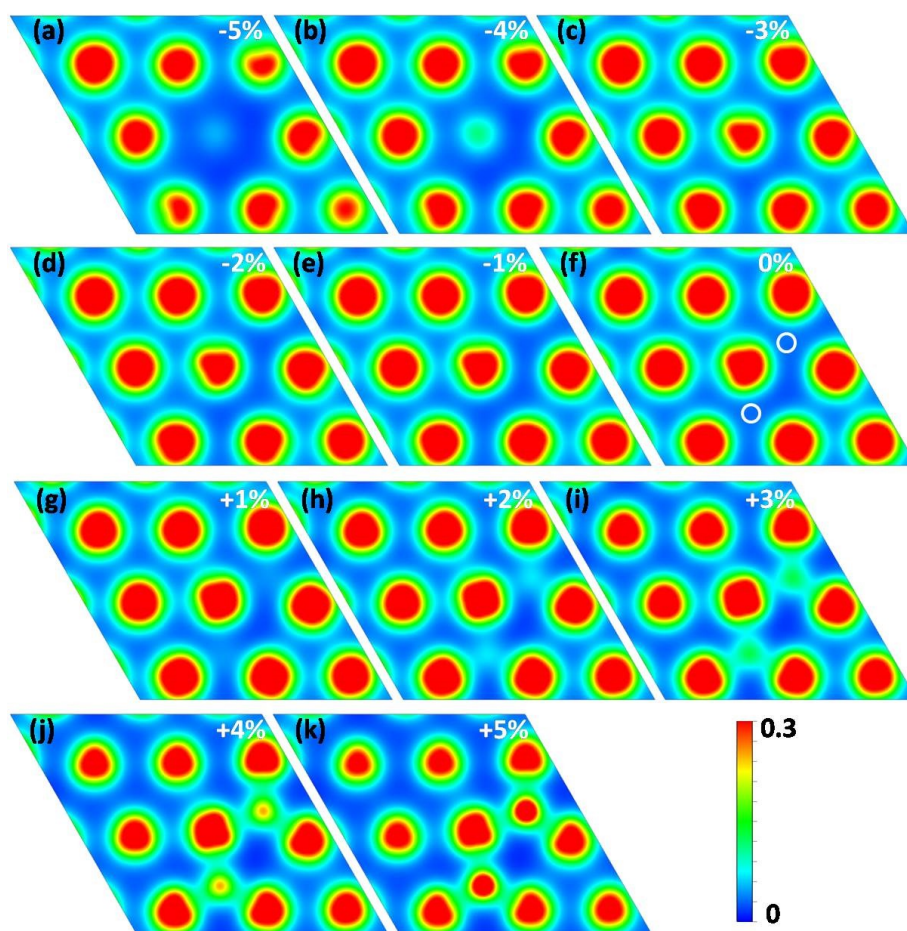

Figure S14. Slices of electron density plots of two 1NN O atoms adsorbed on Pt(111) under the strain (ranging from -5% to +5%). The corresponding strain values are marked in (a) – (k). The white cycles in (f) denote the projected sites of two O\* adatoms. The normal direction of slice is [001] of slab model and  $z = 6.96 \text{ \AA}$  which is the vertical position of surface Pt atoms of O-free and unstrained Pt(111). The electron density shape of Pt atom sandwiched by two O atoms changes obviously with the applied strain, the trend of which is consistent with the variation of  $E_{\text{form}}$ . The spherical symmetric electron density of Pt atoms away from two O\* adatoms is reversed from -5% to +1% strain, while electron density of Pt atoms adjacent to two O\* adatoms is not symmetric within the whole strain range. The variation of electron density indicates that due to O atoms adsorption, all surface Pt atoms could not correspond to the global strain uniformly.



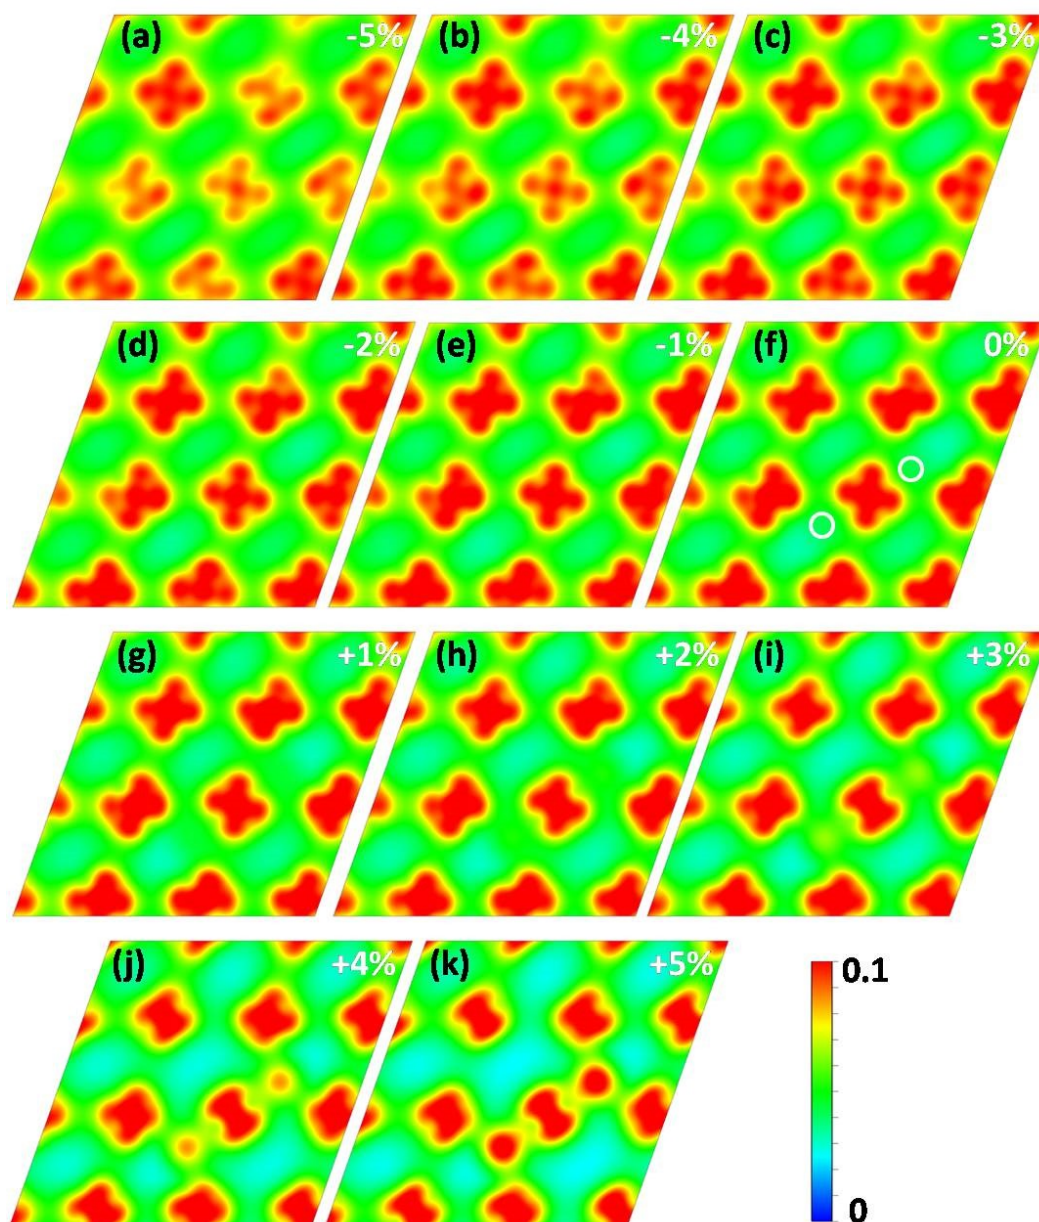

Figure S15. Slices of electron density plots of two 1NN O atoms adsorbed on W(110) under the strain (ranging from -5% to +5%). The corresponding strain values are marked in (a) – (k). The white cycles in (f) denote the projected sites of two O\* adatoms. The normal direction of slice is [001] of slab model and  $z=6.64 \text{ \AA}$ , which is the vertical position of surface W atoms of O-free and unstrained W(110). The electron distribution of density and shape of each W atom is almost similar to one another under the same strain, which indicates that all surface W atoms follow from the strain variation in a similar fashion.

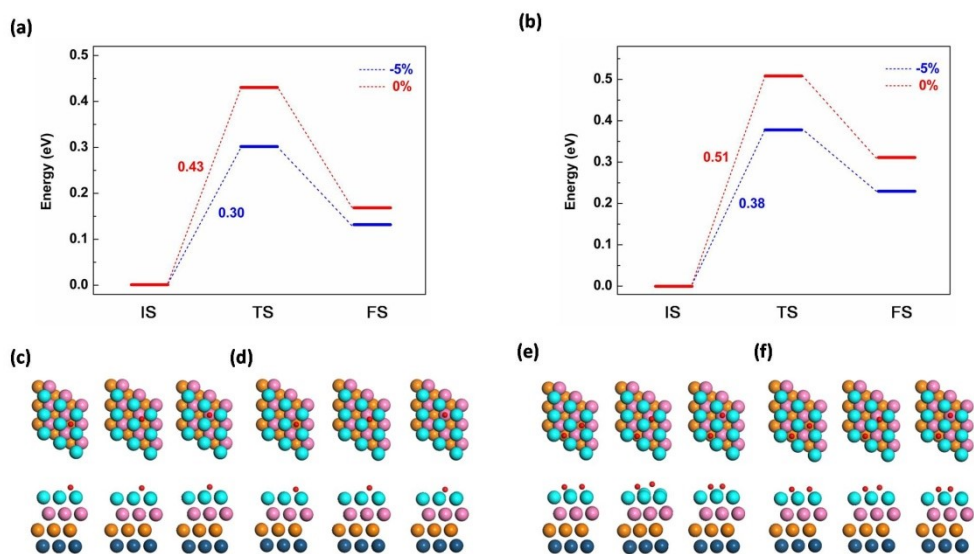

Figure S16. O\* adatom diffusion on Ir(111). Energy profiles over (a) isolated-O\* model and (b) double-O\* model. (c), (d), (e) and (f) Key structures of the O\* adatom diffusion. The panels are the top view, the bottom panels are the side view.

Table S1 Comparison between PW91 and PBE functionals (eV)

| Model             | Strain | $E_{\text{form}}$ |       | $\Delta E_{\text{form}}$ |      | $\Delta E_{\text{form}}\%$ |     |
|-------------------|--------|-------------------|-------|--------------------------|------|----------------------------|-----|
|                   |        | PW91              | PBE   | PW91                     | PBE  | PW91                       | PBE |
| Ir<br>Isolated-O* | -5%    | -1.57             | -1.50 |                          |      |                            |     |
|                   | 0%     | -1.82             | -1.74 | 0.84                     | 0.81 | 46%                        | 47% |
|                   | 5%     | -2.41             | -2.31 |                          |      |                            |     |
| Ir<br>Double-O*   | -5%    | -1.49             | -1.40 |                          |      |                            |     |
|                   | 0%     | -1.78             | -1.69 | 0.76                     | 0.74 | 43%                        | 44% |
|                   | 5%     | -2.25             | -2.15 |                          |      |                            |     |
| Pt<br>Isolated-O* | -5%    | -0.91             | -0.80 |                          |      |                            |     |
|                   | 0%     | -1.22             | -1.11 | 0.70                     | 0.71 | 57%                        | 64% |
|                   | 5%     | -1.61             | -1.51 |                          |      |                            |     |
| Pt<br>Double-O*   | -5%    | -0.75             | -0.64 |                          |      |                            |     |
|                   | 0%     | -1.13             | -1.03 | 0.80                     | 0.82 | 71%                        | 80% |
|                   | 5%     | -1.55             | -1.46 |                          |      |                            |     |

Table S2 Effect of dispersion correction on formation energy (eV)

| Model             | Strain | $E_{\text{form}}$ | $E_{\text{dip}}$ | $\Delta E_{\text{form}}$ | $\Delta E_{\text{form-D3}}$ | $\Delta E_{\text{form}}\%$ | $\Delta E_{\text{form}}\%-\text{D3}$ |
|-------------------|--------|-------------------|------------------|--------------------------|-----------------------------|----------------------------|--------------------------------------|
| Ir<br>Isolated-O* | -5%    | -1.57             | -0.16            |                          |                             |                            |                                      |
|                   | 0%     | -1.82             | -0.15            | 0.84                     | 0.88                        | 46%                        | 45%                                  |
|                   | 5%     | -2.41             | -0.19            |                          |                             |                            |                                      |
| Ir<br>Double-O*   | -5%    | -1.49             | -0.15            |                          |                             |                            |                                      |
|                   | 0%     | -1.78             | -0.15            | 0.76                     | 0.79                        | 43%                        | 41%                                  |
|                   | 5%     | -2.25             | -0.18            |                          |                             |                            |                                      |
| Pt<br>Isolated-O* | -5%    | -0.91             | -0.13            |                          |                             |                            |                                      |
|                   | 0%     | -1.22             | -0.20            | 0.70                     | 0.71                        | 57%                        | 50%                                  |
|                   | 5%     | -1.61             | -0.14            |                          |                             |                            |                                      |
| Pt<br>Double-O*   | -5%    | -0.75             | -0.13            |                          |                             |                            |                                      |
|                   | 0%     | -1.13             | -0.21            | 0.80                     | 0.83                        | 71%                        | 62%                                  |
|                   | 5%     | -1.55             | -0.16            |                          |                             |                            |                                      |

Table S3. Relative change of interplanar spacing between surface and 1<sup>st</sup> subsurface ( $d_{\text{sur-1}^{\text{st}}_{\text{sub}}}$ ).

| Metal<br>facet | Relative change of $d_{\text{sur-1}^{\text{st}}_{\text{sub}}}$ under the strain (%) |     |     |     |     |    |    |    |    |    |    |
|----------------|-------------------------------------------------------------------------------------|-----|-----|-----|-----|----|----|----|----|----|----|
|                | -5%                                                                                 | -4% | -3% | -2% | -1% | 0% | 1% | 2% | 3% | 4% | 5% |
| Sc(0001)       | 5                                                                                   | 4   | 3   | 2   | 1   | 0  | -1 | -2 | -3 | -3 | -4 |
| Ti(0001)       | 5                                                                                   | 4   | 3   | 2   | 1   | 0  | -1 | -1 | -2 | -3 | -3 |
| V(110)         | 9                                                                                   | 7   | 5   | 4   | 2   | 0  | -1 | -2 | -4 | -5 | -6 |
| Cr(110)        | 5                                                                                   | 4   | 3   | 2   | 1   | 0  | -1 | -2 | -3 | -4 | -5 |
| Fe(110)        | 4                                                                                   | 3   | 2   | 2   | 1   | 0  | -1 | -2 | -2 | -3 | -4 |
| Co(111)        | 4                                                                                   | 3   | 2   | 1   | 1   | 0  | -1 | -1 | -2 | -3 | -3 |
| Ni(111)        | 4                                                                                   | 3   | 3   | 2   | 1   | 0  | 0  | -1 | -2 | -3 | -3 |
| Cu(111)        | 5                                                                                   | 4   | 3   | 2   | 1   | 0  | -1 | -2 | -2 | -3 | -4 |
| Zn(0001)       | 4                                                                                   | 2   | 2   | 1   | 1   | 0  | -1 | -1 | -2 | -2 | -6 |
| Y(0001)        | 3                                                                                   | 2   | 2   | 1   | 0   | 0  | -1 | -1 | -2 | -3 | -3 |
| Zr(0001)       | 6                                                                                   | 4   | 3   | 2   | 1   | 0  | -1 | -1 | -2 | -3 | -3 |
| Nb(110)        | 7                                                                                   | 6   | 5   | 3   | 2   | 0  | -1 | -3 | -4 | -5 | -6 |
| Mo(110)        | 5                                                                                   | 4   | 3   | 2   | 1   | 0  | -1 | -2 | -3 | -4 | -5 |
| Tc(0001)       | 3                                                                                   | 2   | 2   | 1   | 0   | 0  | -1 | -1 | -2 | -3 | -3 |
| Ru(0001)       | 3                                                                                   | 2   | 2   | 1   | 1   | 0  | -1 | -2 | -2 | -3 | -4 |
| Rh(111)        | 3                                                                                   | 3   | 2   | 1   | 1   | 0  | -1 | -1 | -2 | -3 | -3 |
| Pd(111)        | 4                                                                                   | 4   | 3   | 2   | 1   | 0  | -1 | -2 | -3 | -4 | -5 |
| Ag(111)        | 7                                                                                   | 5   | 3   | 3   | 2   | 0  | -1 | -2 | -3 | -4 | -5 |
| Cd(0001)       | 3                                                                                   | 2   | 2   | 2   | 0   | 0  | 0  | -2 | -2 | -3 | -6 |
| Hf(0001)       | 3                                                                                   | 3   | 2   | 1   | 1   | 0  | -1 | -1 | -2 | -2 | -3 |
| Ta(110)        | 7                                                                                   | 5   | 4   | 3   | 1   | 0  | -1 | -2 | -4 | -5 | -6 |
| W(110)         | 5                                                                                   | 4   | 3   | 2   | 1   | 0  | -1 | -2 | -3 | -4 | -5 |
| Re(0001)       | 4                                                                                   | 2   | 2   | 1   | 1   | 0  | -1 | -1 | -2 | -3 | -3 |
| Os(0001)       | 3                                                                                   | 3   | 2   | 2   | 1   | 0  | -1 | -1 | -2 | -3 | -3 |
| Ir(111)        | 3                                                                                   | 2   | 2   | 1   | 1   | 0  | -1 | -1 | -2 | -3 | -3 |
| Pt(111)        | 5                                                                                   | 4   | 3   | 2   | 1   | 0  | -1 | -3 | -4 | -5 | -7 |
| Au(111)        | 10                                                                                  | 9   | 7   | 6   | 3   | 0  | -1 | -2 | -4 | -5 | -6 |

Table S4. Formation energy of isolated O atom on the metal close-packed facet.

| Metal<br>facet | $E_{\text{form}}$ of isolated O* (eV) |                     |       |       |                          |                    |       |       |       |       |       |
|----------------|---------------------------------------|---------------------|-------|-------|--------------------------|--------------------|-------|-------|-------|-------|-------|
|                | -5%                                   | -4%                 | -3%   | -2%   | -1%                      | 0%                 | 1%    | 2%    | 3%    | 4%    | 5%    |
| Sc(0001)       | -6.14                                 | -6.20               | -6.27 | -6.34 | -6.40                    | -6.45              | -6.50 | -6.54 | -6.57 | -6.60 | -6.65 |
| Ti(0001)       | -5.90                                 | -5.80               | -5.76 | -5.69 | -5.59                    | -5.56              | -5.56 | -5.55 | -5.55 | -5.57 | -5.63 |
|                |                                       |                     |       |       | -5.41 <sup>2</sup>       |                    |       |       |       |       |       |
| V(110)         | -4.96                                 | -5.03               | -5.05 | -5.07 | -5.04                    | -5.07              | -5.06 | -5.05 | -5.07 | -5.11 | -5.12 |
| Cr(110)        | -4.22                                 | -4.25               | -4.28 | -4.35 | -4.42                    | -4.47              | -4.52 | -4.55 | -4.53 | -4.50 | -4.49 |
| Fe(110)        | -3.31                                 | -3.34               | -3.38 | -3.41 | -3.45                    | -3.50              | -3.55 | -3.56 | -3.53 | -3.51 | -3.08 |
|                |                                       |                     |       |       | -3.43 <sup>3</sup>       |                    |       |       |       |       |       |
| Co(111)        | -2.43                                 | -2.47               | -2.51 | -2.55 | -2.59                    | -2.63              | -2.65 | -2.68 | -2.72 | -2.76 | -2.80 |
|                |                                       |                     |       |       | -2.25 <sup>4</sup>       |                    |       |       |       |       |       |
| Ni(111)        | -2.22                                 | -2.29               | -2.35 | -2.40 | -2.45                    | -2.50              | -2.53 | -2.57 | -2.60 | -2.63 | -2.66 |
|                |                                       |                     |       |       | -5.90-5.44 <sup>5</sup>  |                    |       |       |       |       |       |
| Cu(111)        | -1.61                                 | -1.61               | -1.65 | -1.72 | -1.74                    | -1.78              | -1.82 | -1.85 | -1.88 | -1.90 | -1.93 |
|                |                                       |                     |       |       | -5.18                    | -4.80 <sup>6</sup> |       |       |       |       |       |
| Zn(0001)       | -1.84                                 | -1.80               | -1.79 | -1.83 | -1.91                    | -2.04              | -2.14 | -2.25 | -2.37 | -2.50 | -2.61 |
| Y(0001)        | -5.92                                 | -5.98               | -6.03 | -6.09 | -6.14                    | -6.20              | -6.25 | -6.30 | -6.35 | -6.39 | -6.43 |
| Zr(0001)       | -5.84                                 | -5.84               | -5.76 | -5.71 | -5.64                    | -5.60              | -5.58 | -5.58 | -5.56 | -5.53 | -5.52 |
|                |                                       |                     |       |       | -9.00                    | -8.77 <sup>7</sup> |       |       |       |       |       |
| Nb(110)        | -4.45                                 | -4.52               | -4.59 | -4.63 | -4.65                    | -4.69              | -4.75 | -4.77 | -4.79 | -4.82 | -4.85 |
|                |                                       |                     |       |       | -5.08 <sup>8</sup>       |                    |       |       |       |       |       |
| Mo(110)        | -4.01                                 | -4.02               | -4.06 | -4.10 | -4.15                    | -4.18              | -4.20 | -4.21 | -4.23 | -4.24 | -4.21 |
|                |                                       |                     |       |       | -7.58                    | -7.35 <sup>9</sup> |       |       |       |       |       |
| Tc(0001)       | -3.21                                 | -3.28               | -3.33 | -3.40 | -3.48                    | -3.58              | -3.68 | -3.77 | -3.81 | -3.88 | -3.94 |
| Ru(0001)       | -2.67                                 | -2.74               | -2.81 | -2.88 | -2.95                    | -3.05              | -3.13 | -3.19 | -3.25 | -3.30 | -3.31 |
|                |                                       |                     |       |       | -2.71 <sup>10</sup>      |                    |       |       |       |       |       |
| Rh(111)        | -1.99                                 | -2.00               | -2.02 | -2.06 | -2.10                    | -2.13              | -2.16 | -2.20 | -2.24 | -2.29 | -2.36 |
|                |                                       |                     |       |       | -5.53-5.22 <sup>11</sup> |                    |       |       |       |       |       |
| Pd(111)        | -1.14                                 | -1.22               | -1.28 | -1.34 | -1.38                    | -1.42              | -1.46 | -1.49 | -1.51 | -1.55 | -1.59 |
|                |                                       |                     |       |       | -1.48 <sup>12</sup>      |                    |       |       |       |       |       |
| Ag(111)        | -0.49                                 | -0.52               | -0.52 | -0.55 | -0.60                    | -0.65              | -0.68 | -0.70 | -0.69 | -0.71 | -0.72 |
|                | -4.05                                 | -3.82 <sup>13</sup> |       |       |                          |                    |       |       |       |       |       |
| Cd(0001)       | -1.25                                 | -1.21               | -1.23 | -1.29 | -1.36                    | -1.44              | -1.54 | -1.65 | -1.81 | -1.90 | -1.94 |
| Hf(0001)       | -6.01                                 | -5.86               | -5.78 | -5.74 | -5.72                    | -5.73              | -5.76 | -5.80 | -5.83 | -5.86 | -5.93 |
| Ta(110)        | -4.68                                 | -4.77               | -4.85 | -4.94 | -5.00                    | -5.04              | -5.10 | -5.17 | -5.11 | -5.14 | -5.18 |
| W(110)         | -3.95                                 | -4.02               | -4.07 | -4.14 | -4.22                    | -4.29              | -4.34 | -4.37 | -4.39 | -4.43 | -4.44 |
|                |                                       |                     |       |       | -4.16 <sup>14</sup>      |                    |       |       |       |       |       |
| Re(0001)       | -3.24                                 | -3.27               | -3.32 | -3.41 | -3.52                    | -3.63              | -3.75 | -3.88 | -3.94 | -3.97 | -4.03 |
| Os(0001)       | -2.30                                 | -2.38               | -2.48 | -2.62 | -2.76                    | -2.82              | -2.91 | -3.00 | -3.09 | -3.14 | -3.18 |
| Ir(111)        | -1.57                                 | -1.62               | -1.66 | -1.72 | -1.77                    | -1.82              | -1.89 | -1.96 | -2.06 | -2.22 | -2.41 |
|                |                                       |                     |       |       | -5.22-4.57 <sup>15</sup> |                    |       |       |       |       |       |
| Pt(111)        | -0.91                                 | -0.92               | -0.99 | -1.06 | -1.14                    | -1.22              | -1.31 | -1.43 | -1.51 | -1.58 | -1.61 |

---

|         |      |      |      |       |                     |                            |       |       |       |       |       |
|---------|------|------|------|-------|---------------------|----------------------------|-------|-------|-------|-------|-------|
|         |      |      |      |       | -1.03 <sup>16</sup> |                            |       |       |       |       |       |
| Au(111) | 0.20 | 0.32 | 0.16 | -0.04 | -0.27               | -0.35                      | -0.37 | -0.42 | -0.49 | -0.51 | -0.51 |
|         |      |      |      |       | <b>-3.75</b>        | <b>-3.38</b> <sup>17</sup> |       |       |       |       |       |

---

Formation energy  $E_{\text{form}}$  taking the energy of free oxygen atom as reference are represented in bold.

Table S5. Fitting line of the formation energy of isolated O\*adatoms and the metal's valency.

| Strain | Slope    |          |          | Intercept |          |          |
|--------|----------|----------|----------|-----------|----------|----------|
|        | Period 4 | Period 5 | Period 6 | Period 4  | Period 5 | Period 6 |
| -5%    | 0.54     | 0.62     | 0.84     | -7.67     | -7.76    | -9.09    |
| -4%    | 0.54     | 0.63     | 0.84     | -7.70     | -7.83    | -9.12    |
| -3%    | 0.54     | 0.62     | 0.82     | -7.72     | -7.85    | -9.03    |
| -2%    | 0.53     | 0.62     | 0.80     | -7.72     | -7.86    | -8.97    |
| -1%    | 0.52     | 0.61     | 0.78     | -7.69     | -7.85    | -8.90    |
| 0%     | 0.52     | 0.61     | 0.77     | -7.67     | -7.86    | -8.91    |
| 1%     | 0.51     | 0.60     | 0.77     | -7.67     | -7.88    | -8.97    |
| 2%     | 0.50     | 0.60     | 0.77     | -7.65     | -7.89    | -9.01    |
| 3%     | 0.50     | 0.59     | 0.75     | -7.62     | -7.87    | -8.95    |
| 4%     | 0.49     | 0.59     | 0.75     | -7.60     | -7.87    | -8.96    |
| 5%     | 0.49     | 0.58     | 0.75     | -7.58     | -7.87    | -9.01    |



Table S6. Formation energy of two 1NN O\* adatoms on close-packed metal facets.

| Metal<br>facet | $E_{\text{form}}$ of two O* (eV) |       |       |       |       |       |       |       |       |       |       |
|----------------|----------------------------------|-------|-------|-------|-------|-------|-------|-------|-------|-------|-------|
|                | -5%                              | -4%   | -3%   | -2%   | -1%   | 0%    | 1%    | 2%    | 3%    | 4%    | 5%    |
| Sc(0001)       | -6.14                            | -6.21 | -6.27 | -6.34 | -6.39 | -6.44 | -6.48 | -6.52 | -6.55 | -6.58 | -6.61 |
| Ti(0001)       | -5.66                            | -5.62 | -5.62 | -5.60 | -5.58 | -5.58 | -5.58 | -5.58 | -5.59 | -5.59 | -5.61 |
| V(110)         | -4.99                            | -5.04 | -5.07 | -5.09 | -5.08 | -5.09 | -5.09 | -5.08 | -5.09 | -5.11 | -5.12 |
| Cr(110)        | -4.18                            | -4.20 | -4.24 | -4.29 | -4.33 | -4.37 | -4.41 | -4.45 | -4.44 | -4.42 | -4.42 |
| Fe(110)        | -3.23                            | -3.25 | -3.32 | -3.34 | -3.39 | -3.43 | -3.46 | -3.48 | -3.45 | -3.45 | -3.38 |
| Co(111)        | -2.32                            | -2.35 | -2.38 | -2.41 | -2.45 | -2.48 | -2.52 | -2.56 | -2.60 | -2.64 | -2.69 |
| Ni(111)        | -2.04                            | -2.09 | -2.15 | -2.20 | -2.25 | -2.31 | -2.35 | -2.40 | -2.44 | -2.48 | -2.52 |
| Cu(111)        | -1.46                            | -1.47 | -1.49 | -1.51 | -1.54 | -1.58 | -1.62 | -1.66 | -1.69 | -1.73 | -1.77 |
| Zn(0001)       | -1.90                            | -1.87 | -1.86 | -1.90 | -1.96 | -2.05 | -2.13 | -2.22 | -2.32 | -2.43 | -2.51 |
| Y(0001)        | -5.91                            | -5.96 | -6.01 | -6.07 | -6.12 | -6.17 | -6.21 | -6.26 | -6.30 | -6.34 | -6.38 |
| Zr(0001)       | -5.63                            | -5.67 | -5.66 | -5.65 | -5.63 | -5.61 | -5.61 | -5.61 | -5.61 | -5.60 | -5.59 |
| Nb(110)        | -4.52                            | -4.57 | -4.63 | -4.66 | -4.68 | -4.72 | -4.76 | -4.78 | -4.79 | -4.80 | -4.82 |
| Mo(110)        | -3.87                            | -3.89 | -3.93 | -3.98 | -4.03 | -4.07 | -4.11 | -4.14 | -4.16 | -4.17 | -4.16 |
| Tc(0001)       | -3.18                            | -3.24 | -3.29 | -3.36 | -3.44 | -3.52 | -3.61 | -3.69 | -3.75 | -3.81 | -3.87 |
| Ru(0001)       | -2.58                            | -2.65 | -2.71 | -2.78 | -2.84 | -2.92 | -2.98 | -3.03 | -3.07 | -3.10 | -3.11 |
| Rh(111)        | -1.85                            | -1.88 | -1.92 | -1.96 | -2.00 | -2.03 | -2.07 | -2.11 | -2.15 | -2.19 | -2.24 |
| Pd(111)        | -1.01                            | -1.07 | -1.14 | -1.21 | -1.27 | -1.31 | -1.34 | -1.38 | -1.42 | -1.46 | -1.50 |
| Ag(111)        | -0.39                            | -0.35 | -0.33 | -0.34 | -0.39 | -0.43 | -0.46 | -0.49 | -0.51 | -0.55 | -0.58 |
| Cd(0001)       | -1.28                            | -1.24 | -1.26 | -1.31 | -1.36 | -1.44 | -1.52 | -1.60 | -1.68 | -1.82 | -1.88 |
| Hf(0001)       | -5.84                            | -5.78 | -5.75 | -5.74 | -5.74 | -5.74 | -5.76 | -5.78 | -5.81 | -5.84 | -5.88 |
| Ta(110)        | -4.75                            | -4.84 | -4.91 | -4.98 | -5.03 | -5.06 | -5.09 | -5.13 | -5.11 | -5.11 | -5.13 |
| W(110)         | -3.86                            | -3.93 | -3.99 | -4.04 | -4.10 | -4.15 | -4.20 | -4.24 | -4.28 | -4.32 | -4.35 |
| Re(0001)       | -3.25                            | -3.28 | -3.33 | -3.42 | -3.52 | -3.63 | -3.73 | -3.85 | -3.91 | -3.94 | -3.99 |
| Os(0001)       | -2.28                            | -2.36 | -2.45 | -2.57 | -2.67 | -2.73 | -2.80 | -2.88 | -2.95 | -2.99 | -3.02 |
| Ir(111)        | -1.49                            | -1.54 | -1.60 | -1.66 | -1.72 | -1.78 | -1.83 | -1.89 | -1.98 | -2.11 | -2.25 |
| Pt(111)        | -0.75                            | -0.77 | -0.84 | -0.93 | -1.03 | -1.13 | -1.23 | -1.34 | -1.43 | -1.50 | -1.55 |
| Au(111)        | 0.27                             | 0.22  | 0.17  | 0.04  | -0.11 | -0.18 | -0.22 | -0.29 | -0.37 | -0.42 | -0.45 |

Table S7. Fitting line of the formation energy of two 1NN O\*adatoms and the metal's valency.

| Strain | Slope    |          |          | Intercept |          |          |
|--------|----------|----------|----------|-----------|----------|----------|
|        | Period 4 | Period 5 | Period 6 | Period 4  | Period 5 | Period 6 |
| -5%    | 0.54     | 0.62     | 0.84     | -7.60     | -7.68    | -9.07    |
| -4%    | 0.54     | 0.63     | 0.84     | -7.64     | -7.77    | -9.07    |
| -3%    | 0.54     | 0.63     | 0.83     | -7.69     | -7.82    | -9.07    |
| -2%    | 0.54     | 0.63     | 0.82     | -7.72     | -7.85    | -9.05    |
| -1%    | 0.54     | 0.63     | 0.80     | -7.72     | -7.87    | -9.01    |
| 0%     | 0.53     | 0.62     | 0.79     | -7.72     | -7.89    | -8.99    |
| 1%     | 0.53     | 0.62     | 0.79     | -7.71     | -7.91    | -9.01    |
| 2%     | 0.52     | 0.62     | 0.78     | -7.70     | -7.92    | -9.01    |
| 3%     | 0.51     | 0.61     | 0.77     | -7.68     | -7.93    | -8.97    |
| 4%     | 0.51     | 0.60     | 0.76     | -7.65     | -7.90    | -8.95    |
| 5%     | 0.50     | 0.60     | 0.75     | -7.64     | -7.90    | -8.97    |

Table S8 Comparison between formation energy and free energy (eV)

| Model             | Strain | $E_{\text{form}}$ | $\Delta\text{ZPE}-T\Delta S$ | $\Delta E_{\text{form}}$ | $\Delta G$ | $\Delta E_{\text{form}}\%$ | $\Delta G\%$ |
|-------------------|--------|-------------------|------------------------------|--------------------------|------------|----------------------------|--------------|
| Ir<br>Isolated-O* | -5%    | -1.57             | 0.20                         |                          |            |                            |              |
|                   | 0%     | -1.82             | 0.14                         | 0.84                     | 0.88       | 46%                        | 53%          |
|                   | 5%     | -2.41             | 0.15                         |                          |            |                            |              |
| Ir<br>Double-O*   | -5%    | -1.49             | 0.21                         |                          |            |                            |              |
|                   | 0%     | -1.78             | 0.27                         | 0.76                     | 0.81       | 43%                        | 54%          |
|                   | 5%     | -2.25             | 0.16                         |                          |            |                            |              |
| Pt<br>Isolated-O* | -5%    | -0.91             | 0.15                         |                          |            |                            |              |
|                   | 0%     | -1.22             | 0.11                         | 0.70                     | 0.77       | 57%                        | 69%          |
|                   | 5%     | -1.61             | 0.08                         |                          |            |                            |              |
| Pt<br>Double-O*   | -5%    | -0.75             | 0.16                         |                          |            |                            |              |
|                   | 0%     | -1.13             | 0.14                         | 0.80                     | 0.84       | 71%                        | 84%          |
|                   | 5%     | -1.55             | 0.13                         |                          |            |                            |              |

## References:

- 1 A. Vojvodic, J. K. Nørskov and F. Abild-Pedersen, *Topics in Catal.*, 2013, **57**, 25-32.
- 2 J. Liu, X. Fan, C. Sun and W. Zhu, *RSC Adv.*, 2016, **6**, 71311-71318.
- 3 S. Liu, X. Tian, T. Wang, X. Wen, Y.-W. Li, J. Wang and H. Jiao, *Phys. Chem. Chem. Phys.*, 2015, **17**, 8811-8821.
- 4 S. H. Ma, Z. Y. Jiao, T. X. Wang and X. Q. Dai, *Euro. Phys. J. B*, 2015, **88**, 4.
- 5 N. K. Das and T. Shoji, *Appl. Surf. Sci.*, 2018, **445**, 217-228.
- 6 X. Hao, R. Zhang, L. He, Z. Huang and B. Wang, *Mole. Catal.*, 2018, **445**, 152-162.
- 7 F.-H. Wang, S.-Y. Liu, J.-X. Shang, Y.-S. Zhou, Z. Li and J. Yang, *Surf. Sci.*, 2008, **602**, 2212-2216.
- 8 D. N. Tafen and M. C. Gao, *JOM*, 2013, **65**, 1473-1481.
- 9 Y. G. Zhou, X. T. Zu, J. L. Nie and F. Gao, *Euro. Phys. J. B*, 2009, **67**, 27-34.
- 10 B. Hammer, *Surf. Sci.*, 2000, **459**, 323-348.
- 11 M. V. Ganduglia-Pirovano and M. Scheffler, *Phys. Rev. B*, 1999, **59**, 15533-15543.
- 12 M. Todorova, K. Reuter and M. Scheffler, *J. Phys. Chem. B*, 2004, **108**, 14477-14483.
- 13 Y. Xu, J. Greeley and M. Mavrikakis, *J. Am. Chem. Soc.*, 2005, **127**, 12823-12827.
- 14 M. Stöhr, R. Podloucky and S. Müller, *J. Phys.: Condens. Mat.*, 2009, **21**, 134017.
- 15 W. P. Krekelberg, J. Greeley and M. Mavrikakis, *J. Phys. Chem. B*, 2004, **108**, 987-994.
- 16 T. Xue, C. Wu, X. Ding and J. Sun, *Phys. Chem. Chem. Phys.*, 2018, **20**, 17927-17933.
- 17 A. D. Daigle and J. J. BelBruno, *Surf. Sci.*, 2011, **605**, 1313-1319.
